1 **Impact of maternal iron deficiency anaemia on fetal iron status and placental iron**  
2 **transporters in human pregnancy**

3

4

5 Short Title: Placento- fetal response to maternal iron deficiency

6

7

8 Sreenithi Santhakumar<sup>1</sup>, Rekha Athiyarath<sup>1</sup>, Anne George Cherian<sup>2</sup>, Vinod Joseph Abraham<sup>2</sup>,  
9 Biju George<sup>1</sup>, Paweł Lipiński<sup>3</sup> and Eunice Sindhuvi Edison<sup>1</sup>

10

11 <sup>1</sup>Department of Haematology, Christian Medical College, Vellore, India; <sup>2</sup>Department of  
12 Community Health and Development, Christian Medical College, Vellore, India; <sup>3</sup>Institute of  
13 Genetics and Animal Biotechnology, Polish Academy of Sciences, Jastrzębiec, ul. Postępu  
14 36A, 05-552 Magdalenka Poland.

15

16

17

18 **Corresponding Author**

19

20 Eunice Sindhuvi Edison,  
21 Professor,  
22 Department of Haematology,  
23 Christian Medical College,  
24 Vellore 632 004, Tamil Nadu, India  
25 Telephone 91-416-2283569/3577  
26 Fax 91-416-2226449  
27 E-mail: [eunice@cmcvellore.ac.in](mailto:eunice@cmcvellore.ac.in)

28

29 ORCID PROFILES- E.S., 0000-0002-9726-1324, B.G., 0000-0002-9847-9501

30

31

32

33

34

35

36

37

38

39

40

41

42 **Abstract**

43 Iron deficiency anaemia is associated with maternal morbidity and poor pregnancy outcomes.  
44 Placenta expresses both haem and non-haem iron transport proteins. The aim of the study is  
45 to examine the expression of placental iron trafficking molecules and associate them with  
46 maternal and neonatal iron status. Pregnant women who received prenatal care at the  
47 department of community health and development, Christian Medical College, Vellore, India  
48 for childbirth were recruited between 2016-2018. Pregnant women who were 18-35 years old  
49 with gestational age (GA) of  $\geq 36$  weeks were eligible to participate in the study. In a  
50 prospective cohort of pregnant women, 22% were iron deficiency anaemia (IDA) and 42%  
51 were iron replete. Pregnant women in the different groups were mutually exclusive. Samples  
52 were collected (Maternal blood, placental tissue, and cord blood) from pregnant women with  
53 gestational age of  $\geq 38$  weeks at the time of delivery. Mean gestational age at first visit and  
54 delivery was  $12.8 \pm 2.72$  weeks and  $39 \pm 1.65$  weeks, respectively. Hemoglobin ( $9.3 \pm 0.9$ g/dl)  
55 and ferritin ( $15.4(0.8-28.3)$  ng/ml) levels at delivery were significantly decreased in IDA as  
56 compared to other groups. The foetal haemoglobin and ferritin levels were in the normal  
57 range in all groups. We further analysed the expression of iron transport genes in the placenta  
58 in the iron replete controls and the IDA group. Under maternal iron insufficiency, the  
59 expression of placental iron transporters DMT1 and FPN1 were upregulated at the  
60 transcriptional level. There was no correlation of maternal and cord blood hepcidin with  
61 foetal iron status in IDA. Thus, placental iron traffickers respond to maternal iron deficiency  
62 by increasing their expression and allowing sufficient iron to pass to the foetus.

63

64

65 **Keywords**

66 Pregnancy, Placenta, Iron deficiency anemia, Iron regulators

67

68

69

70

71

72

73

74

75

76

77

78

79

80

81

82

## 83 **1 Introduction**

84 Iron deficiency is a well-known micro nutritional deficiency causing severe anaemia in  
85 maternal women and increases the risk of neuronal impairment in neonates<sup>1</sup>. Iron deficiency  
86 anaemia (IDA) affects 1.7 billion people globally; among them pregnant women are the most  
87 vulnerable population<sup>2</sup>. In India, iron deficiency is most common cause of anaemia in 58% of  
88 pregnant women<sup>3</sup>. During pregnancy, a net cost of 1000mg of iron is required for the  
89 developing fetal-placental unit and increased maternal erythrocyte mass expansion, of which,  
90 one third of iron is utilised for establishing adequate iron stores in neonates at birth<sup>4</sup>. Placenta  
91 dynamically transports maternal iron via syncytiotrophoblasts towards the fetus and balances  
92 iron levels between mother and the fetus. Studies have shown the localisation of various iron  
93 transporters in placental microvillus and basal membranes, but their relevant mechanisms are  
94 poorly understood. The influence of maternal iron status towards the regulation of placental  
95 iron transport and fetal supply are less explored.

96  
97 Hepcidin, the systemic regulator of iron bioavailability, decreases as pregnancy progresses  
98 and reaches to undetectable levels at the end of third trimester<sup>5</sup>. Maternal hepcidin regulates  
99 iron absorption towards fetal iron transport and fetal derived hepcidin regulates placental iron  
100 transporters and determines rate of iron transfer to fetus<sup>6</sup>. The maternal hepcidin contribution  
101 towards placental iron transfer was noted in an isotope study, where pregnant women  
102 (ingested with <sup>57</sup>FeSO<sub>4</sub>) with undetectable level of serum hepcidin had increased  
103 radioisotope transfer to their fetus in comparison to detectable levels of serum hepcidin<sup>7</sup>.  
104 Increased fetal hepcidin levels reported in transgenic mice overexpressing hepcidin was able  
105 to regulate placental ferroportin and leading to severe iron deficiency and lethal<sup>8</sup>.

106  
107 Growth Differentiation Factor 15 (GDF15), a TGF $\beta$  family member known to be involved in  
108 embryonic development, significantly increases during pregnancy. GDF15 has shown to be  
109 expressed strongly in placenta but function is unknown. Data from secondary iron overload  
110 states such as in  $\beta$ -thalassaemia and congenital dyserythropoietic anaemia (CDA) shows that  
111 GDF15 suppresses hepcidin leading to regulation of iron absorption<sup>9</sup>.

112  
113 Placental iron transporters including heme and non- heme iron transporters are in  
114 syncytiotrophoblasts, whose interplay in placental iron acquisition has to be studied further<sup>10</sup>.  
115 Bradley and co-workers analysed 22 pregnant women placental tissues at different gestational  
116 ages<sup>11</sup>. They demonstrated that Iron regulatory protein isoforms IRP1 and IRP2 activity is  
117 present throughout gestation and responds to foetal iron status. IRP1 activity was the  
118 mainstay for post transcriptional regulation of ferritin (FT) and ferroportin (FPN) in  
119 placenta<sup>11</sup>. Chong's immunohistochemical study exhibited isoforms of dimetal transporters  
120 (DMT1) such as DMT1A containing IRE in its 3' UTR and DMT1B without IRE were  
121 expressed in syncytiotrophoblasts, were responsible for cellular iron transport in placenta.<sup>12</sup>  
122 Recent study using IRP1 knockout iron deficient mice illustrated that placental iron  
123 regulators FPN and transferrin receptor(TFRC) function is regulated by IRP1 activity in  
124 response to maternal iron deficiency<sup>13</sup>. Most of the studies have explored IRP1 involvement

125 in placental iron regulation, but the mechanism of placental IRP2 either in normal or iron  
126 deficient condition remains to be characterised.

127

128 Here we investigated the changes of hepcidin, ferritin, GDF15 and haematological  
129 parameters in iron deficient pregnant women and compared them to iron replete pregnant  
130 women. We also compared maternal and fetal iron status with mRNA expression and protein  
131 levels of placental iron transporters.

132

## 133 **2 Materials and Methods**

### 134 **2.1 Study population**

135 The study was approved by Institutional Review Board (Ethics committee) of Christian  
136 Medical College (CMC) at Vellore, India, and informed written consent was obtained from  
137 all the study participants. This is a cross sectional study conducted in pregnant women  
138 between the year 2016-2018. Subjects who visited the antenatal clinic at department of  
139 Community Health and Development, Christian Medical College, Vellore for childbirth were  
140 screened and subjects who fulfilled the inclusion criteria were included in the study (Age-18-  
141 35 years and a gestational age (GA) of  $\geq 36$  weeks). Pregnant women with gestational  
142 diabetes, pregnancy induced hypertension (PIH), hypothyroidism, previous caesarean section,  
143 bacterial or viral infections during onset of labour, twin pregnancy, who received transfusion  
144 during delivery were not included in the study. Daily oral iron supplementation with 60 mg of  
145 elemental iron was recommended for all pregnant women visited our antenatal clinic. A  
146 detailed proforma was recorded including type of delivery, placenta size and newborn details  
147 such as sex, baby weight.

148 Maternal blood samples were collected at admission (GA  $\geq 38$  weeks) prior to or immediately  
149 after delivery. During delivery, the umbilical cord was clamped, cut and cord blood was  
150 collected. Placental tissue was obtained and processed within an hour of delivery.

151 For the analysis, Iron deficiency anaemia in pregnancy (IDA) was defined as Hb level of  
152  $< 10.5$  g/dl with a ferritin level  $< 30$  ng/ml ; iron replete subjects (control) Hb  $> 10.5$  g/dl and  
153 ferritin  $> 30$  ng/ml.

154

### 155 **2.2 Haematological and biochemical Assessment**

156 Complete blood counts (CBC) were carried out on maternal peripheral blood and cord blood  
157 samples using an automated haematology analyser (Sysmex KX21). Serum ferritin was  
158 analysed using a chemiluminescence immunoassay using the Advia Centaur, Siemens XPI.  
159 Serum hepcidin was quantified by using an enzyme immunoassay method from DRG, GmbH  
160 according to the manufacturer's protocol. GDF15 was quantified in serum using an ELISA  
161 method (R&D Systems, Inc. MN, USA).

### 162 **2.3 Placenta collection and processing**

163 Placenta collected during delivery was processed within 1 hour following delivery. Amniotic  
164 membranes were removed from the placenta and tissue of 0.5-0.8cm thickness was incised  
165 from red cotyledons and below the amniotic membrane side of the placenta and a deep cut

166 was avoided. The dissected tissues were stored in RNAlater (Ambion) at -80°C until  
167 analysis.

168 We used variable number tandem repeat (VNTR) analysis using five markers to rule out  
169 maternal contamination in the placental tissues. Briefly DNA was extracted from maternal  
170 peripheral blood, cord blood and placental tissues. A multiplex PCR for five short tandem  
171 repeat (STR) markers (*ACTBP2*, *FES*, *THO1*, *VWF* and *F13A1*) was carried out using  
172 fluorescently labelled primers followed by capillary electrophoresis. It was confirmed that all  
173 placental tissue samples collected had fetal origin (Supplemental Figure 1).

#### 174 **2.4 RNA extraction and PCR Arrays**

175 Total RNA was extracted from the frozen placental tissue using the Protein and RNA  
176 Isolation (PARIS) kit (Qiagen) following the manufacturer's instructions. RNA was reverse  
177 transcribed and converted into cDNA using RT<sup>2</sup> first strand Kit (QIAGEN). The cDNA was  
178 then diluted with nuclease-free water and added to the RT<sup>2</sup> qPCR SYBR green Master Mix  
179 (SA Biosciences, Frederick MD). 25µl of the experimental cocktail was added to each well of  
180 the custom PCR array (SA Biosciences, Frederick MD) (Supplemental Table 1). Real-Time  
181 PCR was performed on the 7500 QPCR System (Applied Biosystems model) and used SYBR  
182 green detection. All data from the PCR was analysed by SA Bioscience's PCR array data  
183 analysis web portal. Plate-to-plate variation was controlled by normalizing gene expression to  
184 β-actin and control placenta by using the 2<sup>-ΔΔCt</sup> method.

#### 185 **2.5 Protein expression of placental Fe transporters by immunoblotting**

186 Placental tissues were lysed by homogenization in cell disruption buffer (PARIS kit,  
187 Ambion) according to the manufacturer's protocol. Protein concentration was quantified  
188 using Bradford assay. All samples were prepared in Lamaelli buffer with reducing agent β-  
189 mercaptoethanol. 50µg of samples used for FPN1 were not pre heated. For DMT1, samples  
190 were prepared in Lamaelli buffer without reducing agent and was not pre-heated. For all  
191 other proteins, 30µg of samples were boiled at 100°C for 5 mins. Protein size markers (Bio-  
192 Rad precision plus protein standards) was loaded without heating. Tissue lysates were  
193 separated by SDS-PAGE gels (4%-12%) and transferred to polyvinylidene difluoride  
194 fluorescence membranes (Millipore, Billerica, MA, USA). Non-fat dry milk (NFD-10%)  
195 was used to block the membranes and probed with primary antibody diluted in 5% NFD-10%  
196 diluted in TBS buffer with 0.1% Tween20 and kept at 4°C for overnight. Membranes were  
197 rinsed and probed with secondary antibody for 1.5hr in NFD-10% blocking buffer containing  
198 0.1% Tween20. The primary and secondary antibodies are listed in Supplemental Table 2.  
199 The bands were visualised using chemiluminescence ECL system (Super signal west femto,  
200 Thermo Scientific). The protein bands were detected by FluorChem E system using digital  
201 darkroom software. Band intensities were quantified by densitometric analysis using ImageJ  
202 software.

#### 203 **2.6 Alternative transcripts of placental iron traffickers**

204 We selected eighteen iron metabolising genes involved in placental iron homeostasis and  
205 their alternative transcript data were retrieved from Ensembl website. Genes include DMT1,  
206 TFRC, FPN1, STEAP3, SLC46A1, HIF1A, ACO1, IREB2, GDF15, TWSG1, SP1, TP53,  
207 GAPDH, HFE, CD163, LRP1, FLVCR1, PGF. Forty-six primer sets were designed to  
208 specifically amplify the main and alternative transcripts of these genes. Of these 46 primer  
209 sets, 23 transcripts were found to be expressed in the placental tissue by qualitative PCR.  
210 Selective amplification of these transcripts was qualitatively confirmed using two controls  
211 and IDA samples. Quantitative PCR was performed for 15 transcripts of eight genes. Relative  
212 quantification was done by using  $2^{-\Delta\Delta Ct}$  method.

## 213 **2.7 Statistical Analysis**

214 Statistical analysis of the data was carried out using the software SPSS, version 20. For  
215 categorical data, the Chi-square test was used. Appropriate statistical tests including t test for  
216 continuous variables, analysis of variance (ANOVA) for comparison of groups, Mann–  
217 Whitney, and Kruskal–Wallis for nonparametric data were used. Associations between fetal  
218 parameters with maternal and placental factors were evaluated using univariate linear  
219 regression.

220

## 221 **3 Results**

### 222 **3.1 Subject characteristics**

223 In this prospective study we enrolled 138 pregnant women who visited the antenatal clinic.  
224 Fourteen subjects were excluded due to the unavailability of either maternal or cord blood  
225 serum samples(Supplemental Figure 2). All had received iron supplements (60mg elemental  
226 Fe/day till delivery) irrespective of the hemoglobin levels at first visit. Of the 124 pregnant  
227 women, 47% were primigravida, 44% second gravida and 9% multigravida. Mean  
228 gestational age at first visit and delivery was  $12.8\pm 2.72$  weeks and  $39\pm 1.65$  weeks,  
229 respectively. Six percent of pregnant subjects delivered preterm (<37weeks of gestation),  
230 45% delivered early term (37-39 weeks), 42.8% delivered at full term (39-42 weeks), 7%  
231 delivered late term (41-42weeks) and one person delivered post term( $\geq 42$ weeks). With  
232 respect to fetal gender, sixty-nine were males and fifty-five were females.

233 Primary aim of the study was to understand placental iron transport in pregnant women with  
234 iron deficiency anemia and healthy controls. We recruited pregnant women based on  
235 hemoglobin levels at the time of admission to labor ward. We classified groups as IDA and  
236 healthy controls based on the hemoglobin and ferritin levels at delivery(Figure 1).

**Figure 1: Classification of study participants**

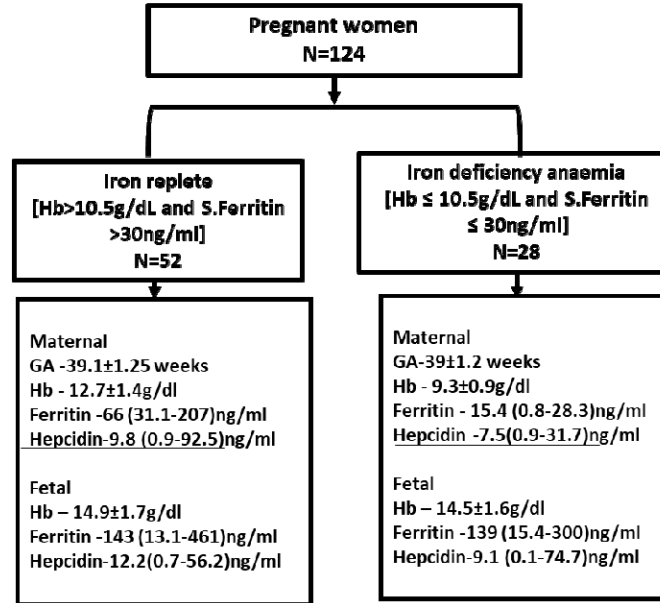

237 Fig 1: Groups classified based on Hemoglobin and ferritin levels. Listed gestational age(GA),  
 238 Hemoglobin (Hb),serum ferritin and hepcidin levels of maternal and cord blood of each  
 239 group.

240 Based on the inclusion criteria, among 124 subjects, 28 subjects had IDA (Hb≤10.5g/dL and  
 241 ferritin values ≤30ng/L) and 52 were iron replete (Hb>10.5g/dL and ferritin >30ng/L).  
 242 Remaining subjects failing to meet the inclusion criteria were excluded from further analyses.

243 The maternal mean age in the IDA was 24±3 and 25±3 years in the controls. At delivery,  
 244 mean gestational age of IDA was 273±9 days and 274±8.8 days in controls, respectively. The  
 245 mean birth weight of term neonates was 2.95±0.34 kg in IDA and 3±0.44 kg in controls.

246 Most (34/50;68%) of the subjects were classified to have mild anemia. In comparison to  
 247 haemoglobin levels at the first antenatal visit, there was significant decrease in haemoglobin  
 248 levels at delivery in IDA (p=0.000) and increase in control group at delivery (p=0.000)  
 249 (Table.1).

250 **Table 1: Baseline parameters of study groups**

|            | Maternal    |                         |                           |           |          | Fetal           |           |           |                 |                        |
|------------|-------------|-------------------------|---------------------------|-----------|----------|-----------------|-----------|-----------|-----------------|------------------------|
|            | Age (Years) | Gestational Age (weeks) | Hb at first visit for ANC | Hb (g/dL) | MCV (fl) | Ferritin (ug/L) | Hb (g/dL) | MCV (fl)  | Ferritin (ug/L) | Mean Birth weight (kg) |
| IDA (N=28) | 24±3        | 273±9                   | 10.7±1.01                 | 9.3± 0.9  | 81.4±9.3 | 15.4 (0.8-28.3) | 14.5±1.6  | 108.7±8.2 | 139 (15.4-300)  | 3±0.44                 |



|                       |       |         |         |          |          |               |          |           |                |           |
|-----------------------|-------|---------|---------|----------|----------|---------------|----------|-----------|----------------|-----------|
| <b>Control (N=52)</b> | 25±3  | 274±8.8 | 11±0.96 | 12.7±1.4 | 93.2±6.7 | 64 (31.1-207) | 14.9±1.7 | 110.8±8.7 | 143 (13.1-461) | 2.96±0.34 |
| <b>P value</b>        | 0.321 | 0.729   | 0.375   | 0.000    | 0.000    | 0.000         | 0.375    | 0.310     | 0.721          | 0.694     |

251 Table 1: Values are mean ± SEM. Hb: haemoglobin; MCV: mean corpuscular volume. Ferritin  
 252 presented as median(range).

253 The mean Hb concentration in term neonates in IDA was 14.5±1.6 g/dl and MCV 81.4±9.3  
 254 fL. The cord serum ferritin was 139 (15.4-300) ng/ml in the IDA group, (n=28). The  
 255 demographic and laboratory parameters of the mother and their fetuses are presented in Table  
 256 1.

### 257 3.2 Assessment of iron status indicators in normal and iron deficient anaemia in 258 pregnancy

259 The median level of maternal hepcidin was found to be 6.9 (0.9-19.5) ng/ml in IDA and 7.6  
 260 (0.9-19.3) ng/ml in controls (p=0.512). The median level of fetal hepcidin was 9.1 (0.2-74.7)  
 261 ng/ml and 11.6 (0.9-54.8) ng/ml in the IDA and controls, respectively(p=0.686). Increased  
 262 GDF15 levels was found in both groups with a median of 36040 (11910-66255) pg/ml in iron  
 263 deficient mothers and 31070 (11477-67330) pg/ml in control group(p=0.365). Normal levels  
 264 of GDF15 were observed in the cord blood of both IDA and controls [3840 (1880-7187)  
 265 pg/ml and 3957 (2435-8542) pg/ml respectively (p=0.396) (Figure 2).

**Fig 2: Ferritin, Hepcidin and GDF15 levels in maternal and foetal cord blood serum**

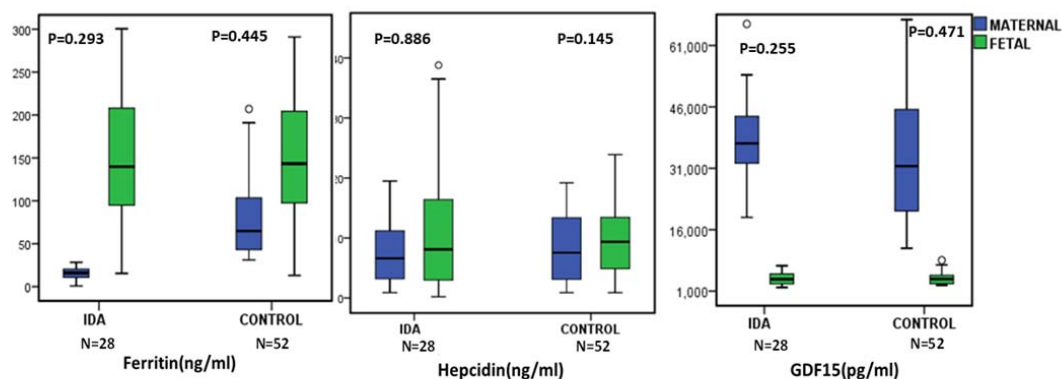

266 Fig 2: Ferritin, hepcidin and GDF15 levels in maternal and fetal cord blood serum compared  
 267 between IDA and control group. The data are presented as mean±SD. Statistical differences  
 268 between groups was determined by Mann-Whitney U rank-sum test for non-normally  
 269 distributed values.

270

271



### 272 **3.3 Association of maternal and fetal iron status indicators**

273 In IDA, fetal cord blood Hb and ferritin levels were significantly higher than maternal Hb and  
274 serum ferritin respectively ( $p=0.000$ ;  $p=0.000$ ) (Table 1). Serum ferritin had positive  
275 correlation with maternal Hb levels in IDA ( $r=0.421$ ,  $p=0.026$ ). Hepcidin and ferritin levels  
276 were independent of each other in both maternal and cord blood.

277 By using univariate regression analysis, we found that fetal hemoglobin was associated with  
278 fetal ferritin level ( $\beta=-0.360$ ;  $P<0.05$ ). Maternal hepcidin: ferritin ratio was significantly higher  
279 in IDA ( $p=0.000$ ) than controls. However, there was no association between maternal and  
280 cord blood hepcidin: ferritin ratio. Conversely, in controls, increased maternal hepcidin was  
281 associated with increased fetal hepcidin and fetal hepcidin: ferritin ratio respectively  
282 ( $r=0.442$ ,  $p=0.001$ ;  $r=0.379$ ,  $p=0.006$ ). Association between fetal ferritin and fetal hepcidin  
283 showed trend towards significance ( $r=0.273$ ,  $p=0.052$ ). Logarithmic fetal hepcidin was related  
284 to maternal ferritin ( $\beta=0.385$ ;  $P=0.047$ ). Fetal GDF15 was related to fetal hepcidin-ferritin  
285 ratio ( $\beta=0.476$ ;  $P=0.014$ ). Interestingly, multigravida pregnant women had significantly lower  
286 maternal hepcidin levels as compared to primigravida ( $p=0.014$ ).

287 In both the groups, GDF15 was significantly higher in maternal serum as compared to cord  
288 blood levels ( $p=0.000$ ). GDF15 did not influence hepcidin and ferritin levels in both mother  
289 and fetus. Interestingly, we observed that maternal GDF15 had negative association with fetal  
290 hepcidin: ferritin ratio in IDA ( $r= -0.439$ ;  $p=0.025$ ).

### 291 **3.4 Analysis of Placental iron transporters and regulators**

292 The expression of iron metabolising genes in maternal and fetal iron transfer were analysed at  
293 mRNA and protein level. Of the six differentially expressed genes, iron transporters (*DMT1*,  
294 *FPN1*), cellular iron regulator *IREB2*, known hepcidin suppressor *GDF15* and its  
295 transcription factor *SPI* were upregulated in IDA (Figure 3a).

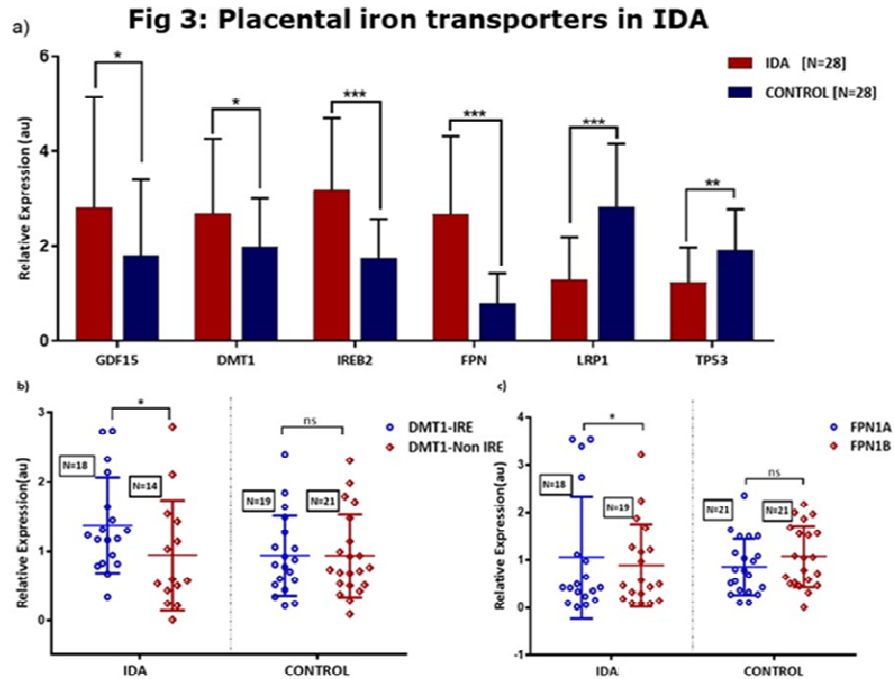

296 Fig 3

297 Figure 3 : a) Differentially expressed placental mRNA expression of iron traffickers in IDA  
 298 and control group quantified using real time PCR. The expression level was normalized to  $\beta$ -  
 299 actin. b&c) DMT1 and FPN isoforms mRNA expressions compared within IDAP and  
 300 control groups. Data are presented as mean  $\pm$  SD. N=28 in each group. Statistical significance  
 301 was calculated using Student's t-test (two-tailed t-test) and the P-values are denoted as NS,  
 302 not significant, \*P=0.05, \*\*P=0.001 and \*\*\*P=0.0001.

303  
 304 Tumor suppressor gene TP53 suggested to which participates in maintenance of intracellular  
 305 iron pool<sup>17</sup> and heme scavenger LRP1 were downregulated in IDA as compared to controls.  
 306 No significant association was observed between mRNA expressions of above-mentioned  
 307 iron transporters with respective downstream protein expression.

308 In IDA, placental TFRC did not differ at mRNA level. Under low iron levels (IDA),  
 309 increased *DMT1* mRNA expression was observed. We found a positive correlation between  
 310 *IREB2* mRNA expression and maternal serum ferritin ( $r=0.519$ ,  $p=0.027$ ). Upregulated  
 311 cellular *FPN1* mRNA levels were associated with increased expression of *IREB2* mRNA  
 312 ( $r=0.635$ ,  $p=0.005$ ).

313 At the protein level, GDF15, DMT1, TFRC and FPN1 were abundantly present in placenta  
314 (Figure 4).

**Fig 4a&b: Changes in placental iron transport expression resulting from maternal iron deficiency anemia**

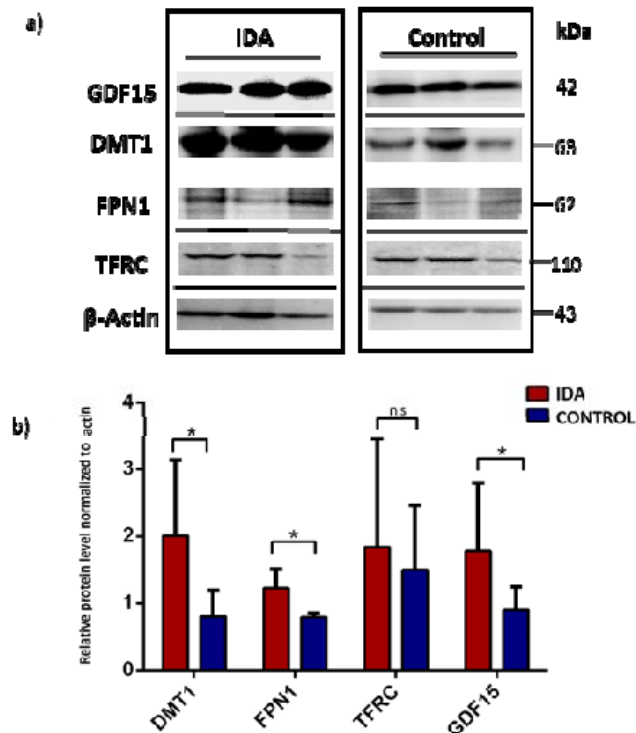

315 Fig 4: Western blot demonstration of placental protein expression of iron traffickers in IDA  
316 and control group.

317 FPN1 protein showed a trend towards significant association with maternal Hb levels  
318 ( $r=0.583$ ;  $p=0.060$ ). DMT1, FPN1 and GDF15 protein was significantly increased in IDA  
319 respectively ( $p=0.019$ ,  $p=0.051$ ,  $p=0.033$ ). Positive associations were evident between  
320 placental GDF15, DMT1 and TFRC proteins in IDA.

321 Maternal Fe status indicators had no association with placental iron transporters at the mRNA  
322 level (Supplementary Table 3). There were no significant associations between *DMT1* protein  
323 expression with maternal and fetal iron status indicators (Supplementary Table 3).

324 On the other hand, heme uptake mediated by placental heme receptor LRP1 was differentially  
325 expressed in IDA ( $p=0.004$ ) as compared to controls. LRP1 mRNA expression was  
326 significantly influenced by maternal ferritin levels ( $r=0.470$ ;  $p=0.049$ ), indicating the  
327 placental heme utilisation supports fetal iron demands. However, the heme scavenger CD163  
328 and exporter FLVCR1 were not differentially expressed.

329 Several studies in line have evidenced the role of TP53 in maintenance of iron homeostasis,  
330 where it has been shown to influence hepcidin and ferritin levels <sup>17</sup>. Zhang et al., have  
331 observed that loss of TP53 levels in iron overload mice had elevated serum iron levels.

332 HAMP promoter region has a p53 putative responsive element which could be activated by  
333 P53. In our study, we observed placental TP53 mRNA expression significantly elevated in  
334 the iron deficient group. Interestingly, the placental TP53 mRNA expression had positive  
335 association with placental *GDF15* mRNA and maternal hepcidin concentration ( $r=0.642$ ,  
336  $p=0.004$ ;  $r=0.492$ ,  $p=0.038$ ). However, this relation needs to be further studied.

337 Gestational age ( $39\pm 1.2$  weeks) had positive influence on placental iron traffickers including  
338 TFRC, LRP1 in IDA ( $r=0.568$ ,  $p=0.017$ ;  $r=0.625$ ,  $p=0.007$ ). Expression of Iron transport  
339 molecules in placenta did not influence neonatal birth weight. Maternal and fetal  
340 haemoglobin levels were not associated with the expression of placental iron transporters.

341 In control group, significant observation was a negative correlation between placental GDF15  
342 mRNA and fetal Hb ( $r=-0.446$ ,  $p=0.022$ ).

### 343 **3.5 Fetal iron transport by placental iron traffickers**

344 Fetal ferritin was related to protein abundance of GDF15 ( $\beta=0.516$  ; $P=0.050$ )and Ferroportin  
345 ( $\beta=0.719$  ; $P<0.019$ ). Fetal hepcidin-ferritin ratio had association with placental *FPN1*  
346 mRNA( $\beta=0.532$  ; $P=0.028$ ). These results indicate that fetal iron status regulates placental  
347 iron traffickers for iron transport towards fetus.

### 348 **3.6 Splice variants in IDA placental iron transport**

349 All splice variant transcripts of targeted iron transporters detected in the placental tissue were  
350 analysed. Alternative Splice variants of DMT1, FPN1, TFRC, SP1 and SLC46A1 were  
351 qualitatively confirmed. We observed differentially expressed isoforms of DMT1 and FPN1  
352 in IDA. *FPN1* mRNA isoforms had increased expression in iron deficient cohort. *FPN1A*  
353 with 5'-Iron Regulatory Element (IRE) [*FPN1A*] expression was increased in IDA as  
354 compared to *FPN1B*. *DMT1A* mRNA isoform containing IRE was stabilized under iron  
355 deficient condition in IDA ( $p=0.05$ ) (Fig 2b). *DMT1A* was positively associated with *IREB2*  
356 ( $r=0.512$ ,  $p=0.018$ ) and *FPN1A* ( $r=0.625$ ,  $p=0.006$ ). SP1 responsible for transcriptional  
357 response to iron deprivation had significant association with increased expression of *FPN1A*  
358 ( $R^2=0.478$ ;  $p=0.003$ ) and *FPN1B* ( $R^2=0.625$ ;  $p=0.006$ ).

359

## 360 **4 Discussions**

361 Iron deficiency anaemia in pregnancy is the most common public health concern affecting  
362 around 80% of pregnant women worldwide<sup>18</sup>. In South and South East Asian (SSEA)  
363 countries, prevalence of maternal anemia is estimated around 52%<sup>19</sup>. In India, 53% pregnant  
364 women have iron deficiency anemia<sup>20</sup>. Here, we investigated how maternal and fetal iron  
365 status relates to placental iron transporters' expression.

366 In our study, despite iron supplementation, 22% pregnant women between 20-35 years old  
367 had iron deficiency anaemia at delivery. A similar finding was observed in Turkish pregnant  
368 women (18.7%)<sup>14</sup>. Iron deficiency also occurred in Gambian pregnant women regardless of  
369 iron supplementation<sup>21</sup>.

370 Most of them were mildly anaemic (Mean Hb –  $9.2 \pm 0.66$ g/dl) identical to a study by Tabrizi  
371 et al., in Iranian pregnant women (Mean Hb level of  $8.99 \pm 0.80$ g/dl)<sup>15</sup>. The risk factors such  
372 as maternal age, gestational age at delivery, gravida and consanguinity had no significant  
373 effects on IDA. Conversely, other findings suggested association between age and anemia<sup>22</sup>.  
374 Association between maternal anemia and low birth weight of newborns has been  
375 documented<sup>23</sup>. However, we did not observe such associations in our study. Cord blood  
376 ferritin and hepcidin are common biomarkers used to determine neonatal iron status at birth<sup>24</sup>.  
377 In our study, neonates born to iron deficient mothers had normal cord blood ferritin levels,  
378 thus confirming normal iron status in neonates.

379 Hepcidin, a systemic iron regulatory hormone, was suppressed in iron deficient cohort when  
380 compared to controls as observed earlier<sup>25</sup>. Maternal hepcidin had no association either with  
381 maternal or fetal iron status in IDA group. The decline in iron stores and hepcidin  
382 concentration at term pregnancy was also reported in Finland pregnant women<sup>26</sup>. Maternal  
383 hepcidin and iron status had no association with fetal iron regulators in IDA as reported in  
384 several studies, indicating the independent regulation of fetal iron status and fetal hepcidin<sup>26</sup>.

385 Several molecules are involved in iron trafficking between mother and foetus, whose  
386 regulation is still not clearly understood. Here we show that maternal iron deficiency did not  
387 affect fetal iron status; rather it had association with placental iron traffickers. During iron  
388 deficiency, TFRC was not differentially expressed at the transcriptional level, but its protein  
389 expression was increased in IDA. This finding was consistent with Sangkhae et al., human  
390 pregnancy model<sup>24</sup>. Iron transporters *DMT1* and *FPN1* mRNA expression were significantly  
391 elevated in IDA. This result signifies that maternal iron deficiency induces placental iron  
392 towards foetal circulation. And this also correlated with the increased expression of cellular  
393 iron-regulatory protein *IREB2*. Hence maternal anaemia has impact on placental iron  
394 traffickers for increased iron for foetal usage.

395 GDF15, an anti-inflammatory cytokine belongs to TGF $\beta$  superfamily, is highly expressed  
396 during pregnancy in the second and third trimester<sup>27,16</sup>. Decreased levels of serum GDF15  
397 was reported in preeclampsia and miscarriage<sup>27,9</sup>. In accordance with other studies, we found  
398 augmented GDF15 concentration in pregnant women<sup>9</sup>. GDF15 suppresses hepcidin in  $\beta$ -  
399 thalassemia<sup>28</sup> and CDA<sup>29</sup>, may control hepcidin in pregnancy. We did not find association of  
400 hepcidin and ferritin with GDF15 levels in both mother and fetus. However, we observed  
401 strong expression of GDF15 in placenta at mRNA and protein level. GDF15 protein  
402 expression had positive associations with TFRC, DMT1, SP1 and TP53 proteins reflecting  
403 essential role of GDF15 in placental iron regulation. This is supported by the fact that  
404 transcription factors SP1 and TP53 are involved in GDF15 upregulation in erythroid cells<sup>16</sup>.  
405 Based on this analysis we suggest SP1 and TP53 increase GDF15 expression in placenta.

406 We postulate that fetal iron status may regulate placental GDF15 and ferroportin for adequate  
407 transfer of iron towards fetal circulation as observed by their positive correlations. However,  
408 the function of placental GDF15 in iron regulation needs to be further characterised.

409 Alternative splicing of pre-mRNA produces multiple mRNA transcripts from a gene through  
410 post transcriptional mechanism<sup>30</sup>. This is the first study, to best of our knowledge to measure  
411 isoforms of multiple non-heme iron transport proteins except FPN1 in human placental tissue  
412 in iron deficient and iron replete groups.

413 Invitro studies have observed DMT1A expression in duodenal enterocytes and DMT1B in  
414 leukocytes<sup>31</sup>. In our study, DMT1A isoform with IRE is significantly increased in iron  
415 deficiency helping in increased iron absorption. FPN1 isoforms localisation in erythroid cells  
416 were initially reported by Cianetti et al<sup>32</sup>. Increased expression of FPN 1A in placenta mirrors  
417 the recent data of Sangkhae and colleagues<sup>24</sup>.

418 In controls, even under replete maternal iron stores, reduced hepcidin levels allowed iron  
419 mobilisation from stores into maternal circulation. Similar to several authors<sup>25, 33, 34</sup>, we also  
420 have observed positive association between hepcidin and ferritin in healthy pregnant women  
421 and no correlation between maternal and fetal iron status.

422 This is one of the few studies to be carried out in humans to understand how iron status is  
423 maintained in the foetus even when the mother has depleted iron stores and anaemia. Several  
424 interesting findings have been identified; however, this study is limited by numbers. It was  
425 not possible to do radio iron transfer in the iron deficient pregnant women. Some correlations  
426 could have thrown more light with functional studies like EMSA.

427 The present observations in the group of iron deficient pregnant women demonstrated that  
428 lower iron status and hepcidin levels induce increased iron mobilisation from iron stores.  
429 Foetal iron status was independent of maternal ferritin and hepcidin levels. Figure 5  
430 summarizes the proposed mechanism of iron regulation in IDA.

431

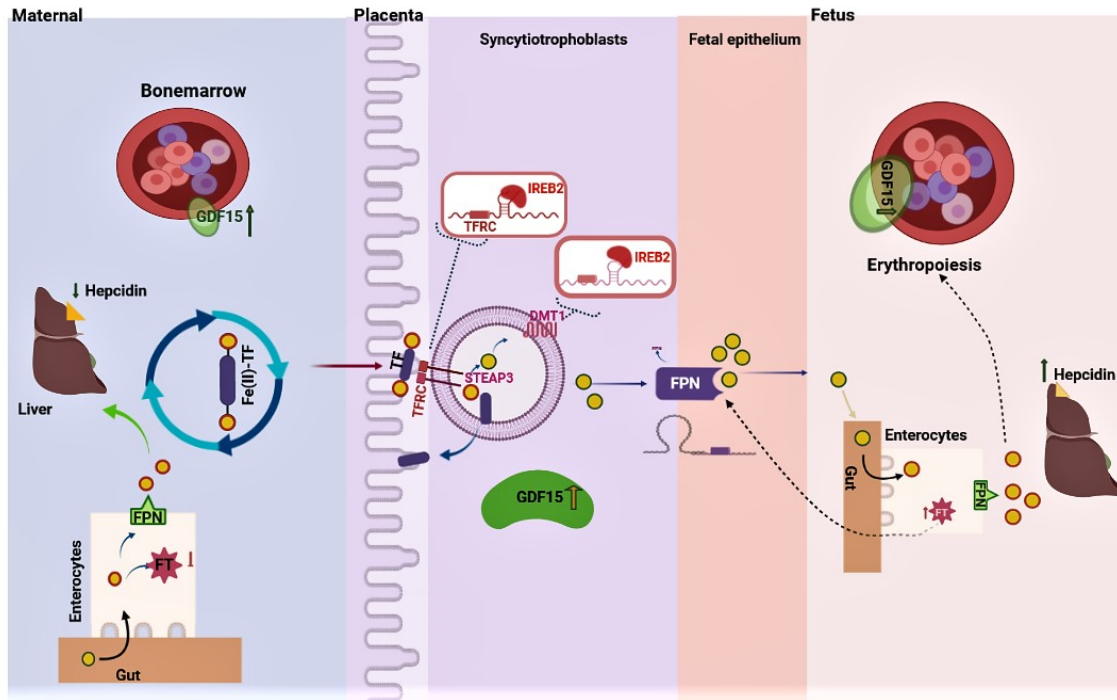

432

433 Fig 5: Proposed mechanism of iron regulation in maternal-placenta-fetal pathway in Iron  
 434 deficiency anaemia of pregnancy

435 Under maternal iron deficiency, Fe absorbed in duodenum are partially stored in ferritin (FT)  
 436 reservoir and maximum Fe released into the circulation via ferroportin (FPN). In the  
 437 circulation, Fe is transported in a complex with transferrin (TF) to hepatocytes and bone  
 438 marrow. Hepcidin suppression elevates FPN expression and results in maximum Fe  
 439 absorption by mobilising Fe from internal stores. Increased erythropoiesis in pregnancy  
 440 induces increased GDF15 production. From maternal circulation, TF-Fe (II) complex binds to  
 441 transferrin receptor (TFRC) in apical side of syncytiotrophoblasts and gets endocytosed.  
 442 Acidified vesicle allows oxidation of ferrous into ferric Fe via STEAP3 and exported into  
 443 cytoplasm through DMT1. IRP2 activity on TFRC and DMT1 promotes their transcription,  
 444 resulting in increased iron transport. Abundant expression of GDF15 in placenta might also  
 445 involve in regulation of Fe transport. From basal side of syncytiotrophoblasts, Fe is exported  
 446 via FPN into the fetal circulation. In fetus, internal iron stores regulate placental FPN and  
 447 GDF15, thereby increasing iron endowment and maintains fetal iron homeostasis.

448 In maternal iron deficiency, placental iron regulators were upregulated and had association  
 449 with fetal iron status, which implies that placenta allows excess iron transport to fetus at the  
 450 expense of mother.

451

452

453

454

455



## 456 **References**

457

- 458 1. Delaney KM, Guillet R, Fleming RE, et al. Umbilical Cord Serum Ferritin  
459 Concentration is Inversely Associated with Umbilical Cord Hemoglobin in Neonates  
460 Born to Adolescents Carrying Singletons and Women Carrying Multiples. *The Journal*  
461 *of Nutrition*. 2019;149(3):406-415. doi:10.1093/jn/nxy286
  
- 462 2. Rahman KM, Ali KM, Vijayalakshmi S, Ramkumar S, Hashmi G. Prevalence of Iron  
463 Deficiency Anaemia and its Associated Factors among Reproductive Age Women in a  
464 Rural Area of Karaikal, Puducherry, India. *JCDR*. Published online 2019.  
465 doi:10.7860/JCDR/2019/36623.12706
  
- 466 3. Kapil U, Bhadoria AS. National Iron-plus initiative guidelines for control of iron  
467 deficiency anaemia in India, 2013. *Natl Med J India*. 2014;27(1):27-29.
  
- 468 4. Bothwell TH. Iron requirements in pregnancy and strategies to meet them. *The*  
469 *American Journal of Clinical Nutrition*. 2000;72(1):257S-264S.  
470 doi:10.1093/ajcn/72.1.257S
  
- 471 5. Koenig MD, Tussing-Humphreys L, Day J, Cadwell B, Nemeth E. Heparin and Iron  
472 Homeostasis during Pregnancy. *Nutrients*. 2014;6(8):3062-3083.  
473 doi:10.3390/nu6083062
  
- 474 6. Sangkhae V, Nemeth E. Placental iron transport: The mechanism and regulatory  
475 circuits. *Free Radic Biol Med*. 2019;133:254-261.  
476 doi:10.1016/j.freeradbiomed.2018.07.001
  
- 477 7. Young MF, Griffin I, Pressman E, et al. Maternal Heparin Is Associated with Placental  
478 Transfer of Iron Derived from Dietary Heme and Nonheme Sources 1234. *J Nutr*.  
479 2012;142(1):33-39. doi:10.3945/jn.111.145961
  
- 480 8. Nicolas G, Bennoun M, Porteu A, et al. Severe iron deficiency anemia in transgenic  
481 mice expressing liver heparin. *Proc Natl Acad Sci U S A*. 2002;99(7):4596-4601.  
482 doi:10.1073/pnas.072632499
  
- 483 9. Finkenstedt A, Widschwendter A, Brasse-Lagnel CG, et al. Heparin is correlated to  
484 soluble hemojuvelin but not to increased GDF15 during pregnancy. *Blood Cells,*  
485 *Molecules, and Diseases*. 2012;48(4):233-237. doi:10.1016/j.bcmed.2012.02.001
  
- 486 10. Maltepe E, Fisher SJ. Placenta: The Forgotten Organ. *Annu Rev Cell Dev Biol*.  
487 2015;31(1):523-552. doi:10.1146/annurev-cellbio-100814-125620
  
- 488 11. Bradley J, Leibold EA, Harris ZL, et al. Influence of gestational age and fetal iron status  
489 on IRP activity and iron transporter protein expression in third-trimester human  
490 placenta. *Am J Physiol Regul Integr Comp Physiol*. 2004;287(4):R894-901.  
491 doi:10.1152/ajpregu.00525.2003
  
- 492 12. Chong WS, Kwan PC, Chan LY, Chiu PY, Cheung TK, Lau TK. Expression of divalent  
493 metal transporter 1 (DMT1) isoforms in first trimester human placenta and embryonic  
494 tissues. *Hum Reprod*. 2005;20(12):3532-3538. doi:10.1093/humrep/dei246

- 495 13. Sangkhae V, Fisher AL, Wong S, et al. Effects of maternal iron status on placental and  
496 fetal iron homeostasis. *The Journal of Clinical Investigation*. Published online October  
497 29, 2019. doi:10.1172/jci127341
- 498 14. Kavak E, Kavak salih burcin. The association between anemia prevalence, maternal age  
499 and parity in term pregnancies in our city. *Perinatal Journal*. 2017;25:6-10.  
500 doi:10.2399/prn.17.0251002
- 501 15. Moghaddam Tabrizi F, Barjasteh S. Maternal Hemoglobin Levels during Pregnancy and  
502 their Association with Birth Weight of Neonates. *Iran J Ped Hematol Oncol*.  
503 2015;5(4):211-217.
- 504 16. Tanno T, Noel P, Miller JL. Growth differentiation factor 15 in erythroid health and  
505 disease. *Curr Opin Hematol*. 2010;17(3):184-190.  
506 doi:10.1097/MOH.0b013e328337b52f
- 507 17. Zhang J, Chen X. p53 tumor suppressor and iron homeostasis. *The FEBS Journal*.  
508 2019;286(4):620-629. doi:<https://doi.org/10.1111/febs.14638>
- 509 18. WHO | Intermittent iron and folic acid supplementation during pregnancy in malaria-  
510 endemic areas. WHO. Accessed January 4, 2021.  
511 [http://www.who.int/elena/titles/intermittent\\_iron\\_pregnancy\\_malaria/en/](http://www.who.int/elena/titles/intermittent_iron_pregnancy_malaria/en/)
- 512 19. Sunuwar DR, Singh DR, Chaudhary NK, Pradhan PMS, Rai P, Tiwari K. Prevalence  
513 and factors associated with anemia among women of reproductive age in seven South  
514 and Southeast Asian countries: Evidence from nationally representative surveys.  
515 Cardoso MA, ed. *PLoS ONE*. 2020;15(8):e0236449. doi:10.1371/journal.pone.0236449
- 516 20. National Family Health Survey. Accessed January 20, 2021. <http://rchiips.org/nfhs/>
- 517 21. Bah A, Pasricha SR, Jallow MW, et al. Serum Hepcidin Concentrations Decline during  
518 Pregnancy and May Identify Iron Deficiency: Analysis of a Longitudinal Pregnancy  
519 Cohort in The Gambia. *The Journal of Nutrition*. 2017;147(6):1131-1137.  
520 doi:10.3945/jn.116.245373
- 521 22. Gautam S, Min H, Kim H, Jeong HS. Determining factors for the prevalence of anemia  
522 in women of reproductive age in Nepal: Evidence from recent national survey data.  
523 *PLOS ONE*. 2019;14(6):e0218288. doi:10.1371/journal.pone.0218288
- 524 23. Widiyanto J, Lismawati G. Maternal age and anemia are risk factors of low birthweight  
525 of newborn. *Enferm Clin*. 2019;29:94-97. doi:10.1016/j.enfcli.2018.11.010
- 526 24. Sangkhae V, Fisher AL, Wong S, et al. Effects of maternal iron status on placental and  
527 fetal iron homeostasis. *J Clin Invest*. 2020;130(2):625-640. doi:10.1172/JCI127341
- 528 25. Kulik-Rechberger B, Kościeszka A, Szponar E, Domosud J. Hepcidin and iron status in  
529 pregnant women and full-term newborns in first days of life. *Ginekologia Polska*.  
530 2016;87(4):288-292. doi:10.17772/gp/62202
- 531 26. Rehu M, Punnonen K, Ostland V, et al. Maternal serum hepcidin is low at term and  
532 independent of cord blood iron status. *European Journal of Haematology*.  
533 2010;85(4):345-352. doi:<https://doi.org/10.1111/j.1600-0609.2010.01479.x>

- 534 27. Chen Q, Wang Y, Zhao M, Hyett J, da Silva Costa F, Nie G. Serum levels of GDF15 are  
535 reduced in preeclampsia and the reduction is more profound in late-onset than early-  
536 onset cases. *Cytokine*. 2016;83:226-230. doi:10.1016/j.cyto.2016.05.002
- 537 28. Tanno T, Bhanu NV, Oneal PA, et al. High levels of GDF15 in thalassemia suppress  
538 expression of the iron regulatory protein hepcidin. *Nat Med*. 2007;13(9):1096-1101.  
539 doi:10.1038/nm1629
- 540 29. Tamary H, Shalev H, Perez-Avraham G, et al. Elevated growth differentiation factor 15  
541 expression in patients with congenital dyserythropoietic anemia type I. *Blood*.  
542 2008;112(13):5241-5244. doi:10.1182/blood-2008-06-165738
- 543 30. Black A, Gamarra J, Giudice J. More than a messenger: Alternative splicing as a  
544 therapeutic target. *Biochim Biophys Acta Gene Regul Mech*. 2019;1862(11-12):194395.  
545 doi:10.1016/j.bbagr.2019.06.006
- 546 31. Tabuchi M, Tanaka N, Nishida-Kitayama J, Ohno H, Kishi F. Alternative Splicing  
547 Regulates the Subcellular Localization of Divalent Metal Transporter 1 Isoforms. *Mol*  
548 *Biol Cell*. 2002;13(12):4371-4387. doi:10.1091/mbc.E02-03-0165
- 549 32. Cianetti L, Segnalini P, Calzolari A, et al. Expression of alternative transcripts of  
550 ferroportin-1 during human erythroid differentiation. *Haematologica*.  
551 2005;90(12):1595-1606.
- 552 33. van Santen S, Kroot JJC, Zijderveld G, Wiegerinck ET, Spaanderman MEA, Swinkels  
553 DW. The iron regulatory hormone hepcidin is decreased in pregnancy: a prospective  
554 longitudinal study. *Clin Chem Lab Med*. 2013;51(7):1395-1401. doi:10.1515/cclm-  
555 2012-0576
- 556 34. Lorenz L, Herbst J, Engel C, et al. Gestational Age-Specific Reference Ranges of  
557 Hepcidin in Cord Blood. *NEO*. 2014;106(2):133-139. doi:10.1159/000360072

558

559

560

561

562

563

564

565

566

567

568

569 **Source of Funding**

570 This research was supported by the grant DST/INT/POL/P-7/2014 from the Department of  
571 Science and Technology, Government of India to ES.

572 **Conflict- of- Interest disclosure:** The authors declare no competing financial interests.

573 **Authorship**

574 Contribution: S.S. performed the experiments, analysed the data, prepared tables, figures and  
575 wrote the paper; E.S. and S.S. performed the statistical analysis; A.G.C. and V.J.A. recruited  
576 and treated the pregnant women. R.A., A.G.C., B.G., provided critical advice and edited the  
577 paper. P.L gave valuable inputs to the study and reviewed the manuscript. E.S.  
578 conceptualized and supervised the research, organised the data, edited the paper. All authors  
579 approved read and approved the final manuscript.

580 **Acknowledgement**

581 We thank Dr. Arun Jose and Dr. Joseph Bondu for helping in biochemical analysis.

582 ORCID PROFILES- E.S., 0000-0002-9726-1324, B.G., 0000-0002-9847-9501

583 Correspondence: Eunice Sindhuvi, Department of Hematology, Christian Medical College,  
584 Vellore-632004,TamilNadu,India, Email: [eunice@cmcvellore.ac.in](mailto:eunice@cmcvellore.ac.in)

585

586 **Ethics approval**

587 The study was approved by Institutional Review Board (Ethics committee) of Christian  
588 Medical College (CMC) at Vellore, India, (IRB No.9360 and dated 25-03-2015).

589 **Consent to participate**

590 Informed consent was obtained from all individual participants included in the study.

591

592
